# Supplementary material for: Development of Mucosal PNAd+ and MAdCAM-1+ Venules during Disease Course in Ulcerative Colitis
Source: PubMed Central journal article supplement (PMC7226824; doi:10.3390/cells9040891), 2020-04-06
Supplement: cells-09-00891-s001.pdf [file cells-09-00891-s001.pdf]

**Supplementary table S1. Patient characteristics at follow-up endoscopy.**

|                                               | All UC patients<br>n=378  | Non-inflamed UC at<br>follow-up<br>n=93 | Inflamed UC at<br>follow-up<br>n= 285 | P-<br>value** |
|-----------------------------------------------|---------------------------|-----------------------------------------|---------------------------------------|---------------|
| <b>Clinical follow-up time in months</b>      | 128 (85-165)              | 150 (106.5-169.5)                       | 121 (82-159)                          | 0.002         |
| <b>Time till first exacerbation in months</b> |                           |                                         |                                       |               |
| - No exacerbation during follow-up, n (%)     | 25 (10.59%)<br>41 (10.8%) | 48 (18-125)<br>28 (30.1%)               | 21 (9-49)<br>13 (4.6%)*               | 0.001         |
| - Exacerbation, n (%)                         | 337 (89.2%)               | 65 (69.9%)                              | 272 (95.4%)                           |               |
| <b>Surgery during clinical follow-up</b>      | 24 (6.3%)                 | 2 (2.2%)                                | 22 (7.7%)                             | 0.06          |
| <b>Mayo endoscopic score</b>                  |                           |                                         |                                       |               |
| - Mayo 0                                      | 93(24.6%)                 | 93(100%)                                | -                                     | 0.001         |
| - Mayo 1                                      | 107 (28.3%)               | -                                       | 107 (37.5%)                           |               |
| - Mayo 2                                      | 124 (32.8%)               | -                                       | 124 (43.5%)                           |               |
| - Mayo 3                                      | 54 (14.3%)                | -                                       | 54 (18.9%)                            |               |
| <b>UC localization</b>                        |                           |                                         |                                       |               |
| - Extent                                      |                           |                                         |                                       |               |
| o E1: Ulcerative proctitis                    | 86 (22.8%)                | -                                       | 86 (30.2%)                            | 0.001         |
| o E2: Left-sided UC                           | 130 (34.4%)               | -                                       | 130 (45.6%)                           |               |
| o E3: Extensive UC                            | 69 (18.3%)                | -                                       | 69 (24.3%)                            |               |
| o Remission                                   | 93 (24.6%)                | 93 (100%)                               | -                                     |               |
| <b>Histological inflammation</b>              |                           |                                         |                                       |               |
| <b>Geboes score</b>                           |                           |                                         |                                       |               |
| - $\geq 0.1$ and $< 3.1$                      | 151 (43%)                 | 80 (86%)                                | 71 (25%)                              | 0.001         |
| - $\geq 3.1$                                  | 217 (57%)                 | 13 (14%)                                | 214 (75%)                             |               |
| <b>Treatment at follow-up endoscopy</b>       |                           |                                         |                                       |               |
| - None                                        | 100 (26.5%)               | 21 (22.6%)                              | 79 (27.7%)                            | 0.002         |
| - 5-ASA                                       | 152 (40.2%)               | 44 (47.3%)                              | 108 (37.9%)                           |               |
| - Topical steroids                            | 14 (3.7%)                 | 1 (1.1%)                                | 13 (4.6%)                             |               |
| - Oral steroids                               | 37 (9.8%)                 | 1 (1.1%)                                | 36 (12.6%)                            |               |
| - Immunomodulators                            | 40 (10.6%)                | 16 (17.2%)                              | 24 (8.4%)                             |               |
| - Anti-TNF                                    | 32 (8.5%)                 | 10 (10.8%)                              | 22 (7.7%)                             |               |
| - Anti-integrins                              | 3 (0.8%)                  | 0 (0%)                                  | 3 (1.1%)                              |               |
| - Surgery                                     |                           |                                         |                                       |               |
| <b>Highest treatment during follow-up</b>     |                           |                                         |                                       |               |
| - None                                        | 1(0.3%)                   | 0 (0%)                                  | 1 (0.4%)                              | 0.06          |
| - 5-ASA                                       | 88 (22.7%)                | 25 (26.9%)                              | 63 (22.1%)                            |               |
| - Topical steroids                            | 52 (13.4%)                | 8 (8.6%)                                | 44 (15.4%)                            |               |
| - Oral steroids                               | 42 (10.8%)                | 11 (11.8%)                              | 31 (10.9%)                            |               |
| - Immunomodulators                            | 101 (26%)                 | 25 (26.9%)                              | 76 (26.7%)                            |               |
| - Anti-TNF                                    | 62 (16%)                  | 22 (23.7%)                              | 40 (14.0%)                            |               |
| - Anti-integrins                              | 9 (2.3%)                  | 0 (0%)                                  | 9 (3.2%)                              |               |
| - Surgery                                     | 23 (5.9%)                 | 2 (2.2%)                                | 21 (7.4%)                             |               |

Values expressed in n (%) or as median with interquartile range.

\*Biopsies were taken during follow-up endoscopy in UC patients who did not reach remission after initial diagnosis. \*\* Non-inflamed UC compared to inflamed UC patients; HC, Healthy control; UC, ulcerative colitis.

**Supplementary table 2.** Univariable and multivariable analysis of potential variables correlating with the expression of PNAd<sup>+</sup> and MAdCAM-1<sup>+</sup> venules as a proportion of ERG<sup>+</sup> venules in active disease at follow-up endoscopy (A+B).

| A. <i>Follow-up PNAd</i>                                                                             | <i>Univariable</i> |               |              | <i>Multivariable</i> |              |
|------------------------------------------------------------------------------------------------------|--------------------|---------------|--------------|----------------------|--------------|
|                                                                                                      | R <sup>2</sup> (%) | β (SE)        | p-value      | β (SE)               | p-value      |
| Follow-up PA is the first exacerbation*                                                              | 3.2                | -0.18 (0.005) | <b>0.08</b>  |                      | NS           |
| Disease location **                                                                                  | 33.5               | -0.58 (0.002) | <b>0.001</b> | -0.37 (0.002)        | <b>0.001</b> |
| Histologic disease activity                                                                          |                    |               |              |                      |              |
| - Geboes 0                                                                                           | 19.2               | 0.44 (0.004)  | <b>0.001</b> |                      | NS           |
| - Geboes 1                                                                                           | 21.7               | 0.47 (0.004)  | <b>0.001</b> |                      | NS           |
| - Geboes 2A                                                                                          | 19.1               | 0.44 (0.004)  | <b>0.001</b> |                      | NS           |
| - Geboes 2B                                                                                          | 27.4               | 0.52 (0.003)  | <b>0.001</b> |                      | NS           |
| - Geboes 3                                                                                           | 29.2               | 0.54 (0.005)  | <b>0.001</b> |                      | NS           |
| - Geboes 4                                                                                           | 32.0               | 0.57 (0.005)  | <b>0.001</b> | 0.33 (0.006)         | <b>0.003</b> |
| - Geboes 5                                                                                           | 17.8               | 0.42 (0.003)  | <b>0.001</b> |                      | NS           |
| *Yes=1, no=2 ** Proctitis=1, left-sided=2, extensive=3<br>β=Regressioncoefficient, SE=Standard Error |                    |               |              |                      |              |
| B. <i>Follow-up MAdCAM-1</i>                                                                         | <i>Univariable</i> |               |              | <i>Multivariable</i> |              |
|                                                                                                      | R <sup>2</sup> (%) | β (SE)        | p-value      | β (SE)               | p-value      |
| Follow-up PA is the first exacerbation*                                                              | 5.6                | -0.24 (0.012) | <b>0.02</b>  |                      | NS           |
| Disease location**                                                                                   | 0.1                | -0.04 (0.006) | 0.71         | -                    | -            |
| Histologic disease activity                                                                          |                    |               |              |                      |              |
| - Geboes 0                                                                                           | 1.0                | 0.10 (0.011)  | 0.34         | -                    | -            |
| - Geboes 1                                                                                           | 4.5                | 0.21 (0.01)   | <b>0.04</b>  | <b>0.26 (0.01)</b>   | NS           |
| - Geboes 2A                                                                                          | 6.9                | 0.26 (0.01)   | <b>0.01</b>  |                      | <b>0.01</b>  |
| - Geboes 2B                                                                                          | 5.3                | 0.23 (0.01)   | <b>0.02</b>  |                      | NS           |
| - Geboes 3                                                                                           | 2.7                | 0.16 (0.013)  | <b>0.11</b>  |                      | NS           |
| - Geboes 4                                                                                           | 1.7                | 0.13 (0.014)  | <b>0.20</b>  |                      | NS           |
| - Geboes 5                                                                                           | 0.6                | 0.08 (0.009)  | 0.47         | -                    | -            |
| *Yes=1, no=2 ** Proctitis=1, left-sided=2, extensive=3<br>β=Regressioncoefficient, SE=Standard Error |                    |               |              |                      |              |

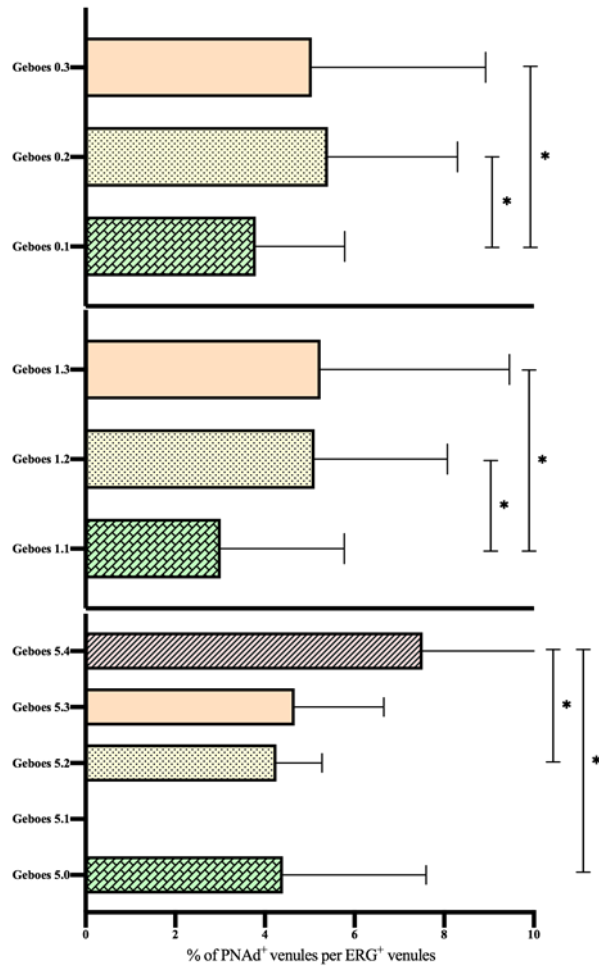

**Supplementary Figure 1 .** Grades 0 (Architectural changes), 1 (Chronic inflammatory infiltrate) and 5 (The presence of erosions and ulcerations) of the Geboes score for assessment of ulcerative colitis histological disease activity correlate with % of PNAd<sup>+</sup> venules per ERG<sup>+</sup> venules. There was no significant association between the Geboes Grades 2 (Eosinophils and neutrophils in the lamina propria),3 (Neutrophils in the epithelium) and 4 (Crypt destruction) and the proportion of PNAd<sup>+</sup> venules (not shown in this figure). \* p-value < 0.05. ERG, ETS related gene; PNAd, peripheral node addressin; UC, ulcerative coliti
